# Supplementary material for: Moonlight Makes Owls More Chatty
Source: PubMed Central journal article supplement (PMC2808345; doi:10.1371/journal.pone.0008696), 2010-01-20

## Supporting Information 1 (Figure S1)

The remarkable differences in conspicuousness of the white feathers of eagle owl throat badges on a moonlight night (A) and a dark night (B). During full moon periods, this visual signal is more visible and contrasts best with the background.

**A**

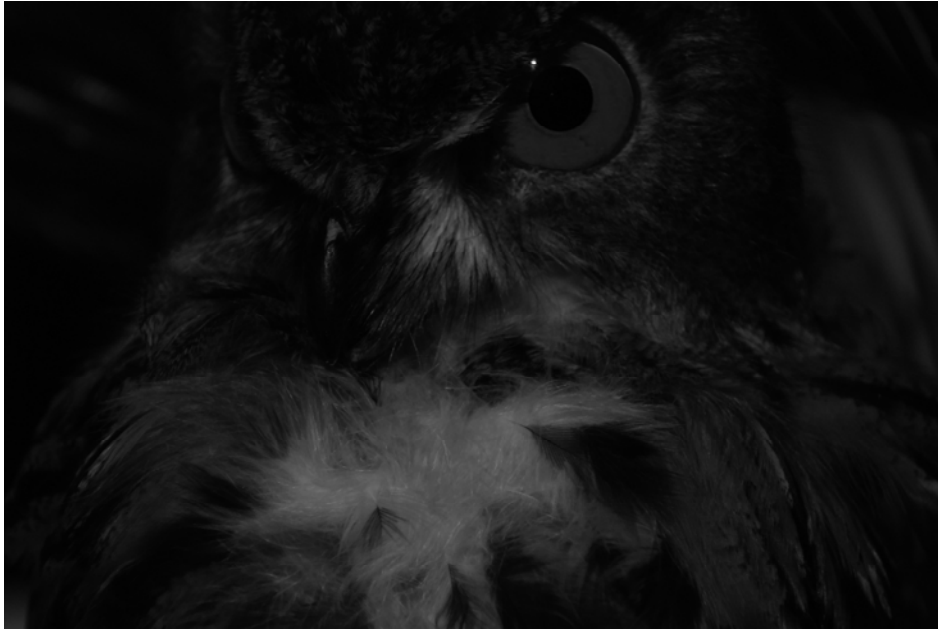

**B**

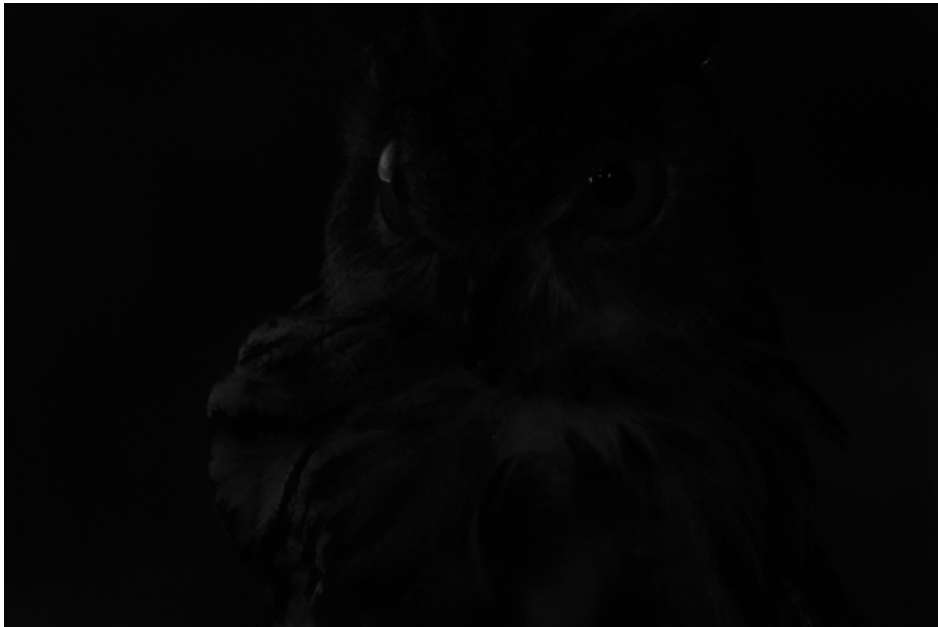

Supplement: pone.0008696.s001.pdf [file pone.0008696.s001.pdf]
